# Supplementary material for: Factors Associated With Quality of Life Among Colorectal Cancer Patients: Cross-Sectional Study
Source: PubMed Central journal article supplement — Cancer Control. 2024 Nov 18;31:10732748241302915. doi: 10.1177/10732748241302915 (PMC11574891; doi:10.1177/10732748241302915), 2024-11-18
Supplement: sj-pdf-1-ccx-10.1177_10732748241302915.pdf [file sj-pdf-1-ccx-10.1177_10732748241302915.pdf]

## Data Collection and Presentation Checklist:

| Ethical Statements (if applicable):           |                                                                                                                                                                                          |                                     |
|-----------------------------------------------|------------------------------------------------------------------------------------------------------------------------------------------------------------------------------------------|-------------------------------------|
| <b>Humans</b>                                 | Complete and upload the Ethics Declaration Statement you received with your decision letter.                                                                                             | <input checked="" type="checkbox"/> |
| <b>Animals</b>                                | Provide species, sex, strain, age, source and husbandry conditions.                                                                                                                      | <input type="checkbox"/>            |
|                                               | Note if the study was blinded or not.                                                                                                                                                    | <input type="checkbox"/>            |
|                                               | Provide a statement confirming the research was approved by the Institutional Animal Care and Use Committee.                                                                             | <input type="checkbox"/>            |
|                                               | Complete and upload the <a href="#">ARRIVE Compliance Questionnaire</a> . Visit <a href="#">ARRIVE</a> for more information.                                                             | <input type="checkbox"/>            |
| Reagents and Biological Materials:            |                                                                                                                                                                                          |                                     |
|                                               | Include manufacture name, catalog number (and lot number for antibodies) for all reagents used (including fluorochromes and stains).                                                     | <input type="checkbox"/>            |
|                                               | Cell lines: provide source, derivation and authentication method.                                                                                                                        | <input type="checkbox"/>            |
| Images                                        |                                                                                                                                                                                          |                                     |
| <b>General</b>                                | Do not introduce or remove any features in your images. Leave any blemishes.                                                                                                             | <input type="checkbox"/>            |
|                                               | If any adjustments to contrast, balance or brightness are made, they must be applied uniformly across the entire image. Any nonlinear adjustments must be disclosed in the legend.       | <input type="checkbox"/>            |
|                                               | Check that images are not pixelated when reasonably magnified. Images must be at 300 dpi. TIFF images are encouraged. Avoid jpegs or using PowerPoint as this will compress your images. | <input type="checkbox"/>            |
|                                               | Scale bars must be included.                                                                                                                                                             | <input type="checkbox"/>            |
|                                               | If splicing images, the borders must be marked and noted in the legend.                                                                                                                  | <input type="checkbox"/>            |
| <b>Microscopy<br/>(include the following)</b> | Camera make and model.                                                                                                                                                                   | <input type="checkbox"/>            |
|                                               | Microscope make and model.                                                                                                                                                               | <input type="checkbox"/>            |
|                                               | Objective magnification, type and numerical aperture. Magnification must be mentioned in figure legend.                                                                                  | <input type="checkbox"/>            |

|                                           |                                                                                                                                                                                                                                                                       |                          |
|-------------------------------------------|-----------------------------------------------------------------------------------------------------------------------------------------------------------------------------------------------------------------------------------------------------------------------|--------------------------|
|                                           | Fluorochromes and stains. They should also be mentioned in the legend.                                                                                                                                                                                                | <input type="checkbox"/> |
|                                           | Acquisition software.                                                                                                                                                                                                                                                 | <input type="checkbox"/> |
|                                           | Show all individual channels in grey scale and merged image in color (all at the same intensity).                                                                                                                                                                     | <input type="checkbox"/> |
| <b>Western Blots</b>                      | Westerns should <u>not</u> be modified for contrast, the entire tonal range should be present.                                                                                                                                                                        | <input type="checkbox"/> |
|                                           | Include at least two molecular weight markers, one above and one below your band of interest.                                                                                                                                                                         | <input type="checkbox"/> |
|                                           | If a blot is spliced together, you must mark the border and explain this in the legend. Splicing across different blots is <u>not</u> allowed.                                                                                                                        | <input type="checkbox"/> |
|                                           | It is best practice to normalize protein levels against total protein, not house-keeping proteins.                                                                                                                                                                    | <input type="checkbox"/> |
|                                           | Post-translationally modified proteins (PTMs) must use total protein for normalization.                                                                                                                                                                               | <input type="checkbox"/> |
|                                           | Provide raw blots as supplementary data. These may be combined as a single Word doc. Blots must be accurately labeled to match figures in the main doc. Include the molecular weight ladder.                                                                          | <input type="checkbox"/> |
| <b>RNAi, Gene Expression, Microarrays</b> | At least two different siRNAs targeting different gene areas must be used.                                                                                                                                                                                            | <input type="checkbox"/> |
|                                           | At least two different control siRNAs must be used.                                                                                                                                                                                                                   | <input type="checkbox"/> |
|                                           | Gene expression studies cannot be presented alone without providing evidence that the changes in levels have downstream functional consequences.                                                                                                                      | <input type="checkbox"/> |
|                                           | Microarray data must include: <ul style="list-style-type: none"> <li>○ The raw data for each hybridization.</li> <li>○ Experimental Factors and values.</li> <li>○ Experimental design.</li> <li>○ Data processing protocols (e.g., normalization method).</li> </ul> | <input type="checkbox"/> |
| <b>Cell culture</b>                       | At least three appropriate cell lines should be used to confirm findings. If there are fewer, add a statement explaining why only 1 or 2 were used.                                                                                                                   | <input type="checkbox"/> |
