# Supplementary material for: Factors Associated With Quality of Life Among Colorectal Cancer Patients: Cross-Sectional Study
Source: PubMed Central journal article supplement — Cancer Control. 2024 Nov 18;31:10732748241302915. doi: 10.1177/10732748241302915 (PMC11574891; doi:10.1177/10732748241302915), 2024-11-18
Supplement: sj-pdf-2-ccx-10.1177_10732748241302915.pdf [file sj-pdf-2-ccx-10.1177_10732748241302915.pdf]

## Approval ethical questions

*Please answer the following questions regarding the ethics approval:*

1. Have you submitted Original and translated ethics forms as requested?

Yes

2. What's the ethics approval number?

Approval number: CEI-0190-03-2023, minute #122

Have you confirmed the ethics approval number is the same in the title page, manuscript, and the approval document?

Yes

3. Does the title in the ethics approval document match with that of the submitted manuscript? If not, provide a reason.

The title in the ethics approval as similar to paper:

Paper: Factors Associated with Quality of Life among Colorectal Cancer Patients: Clinical Practice Implications.

Approval: Factores asociados a la calidad de vida en pacientes con cáncer colorrectal de la fundación clínica vida en el año 2022.

4. Does the ethics approval cover the patient population used in the study?

Yes

5. Is your study prospective or retrospective? Please indicate the type of study in your abstract and methods sections.

Cross-sectional study

6. Does the study period mentioned in the ethics approval document cover the study period in the manuscript?

Yes

7. Is the applicant in the Ethics approval document one of the authors of the submitted manuscript?

Yes

8. Does the ethics committee that approved the study belong to the same affiliation as authors? If not, please provide a reason.

The ethics committee that approved the study is separate from the authors' affiliations, as the authors are affiliated with a university that does not have its own ethics committee. The ethics committee is part of the same institute where the study's patients are being treated.

- 9.** Have you obtained informed consent from the study participants? If it was obtained, please indicate this in Materials and Methods and indicate if the consent obtained was written or verbal and what the patient consent was for.

Yes, we obtained informed consent from the study participants. This was verbal.

- 10.** Is the consent statement same in the ethics form, title page and approval document?

Yes

- 11.** Is the study conducted in more than one center? If yes, please provide ethics approval documents from all the centers.

No, this is monocentric, in the Clinic VIDA.
