# Supplementary material for: Factors Associated With Quality of Life Among Colorectal Cancer Patients: Cross-Sectional Study
Source: PubMed Central journal article supplement — Cancer Control. 2024 Nov 18;31:10732748241302915. doi: 10.1177/10732748241302915 (PMC11574891; doi:10.1177/10732748241302915), 2024-11-18
Supplement: sj-pdf-3-ccx-10.1177_10732748241302915.pdf [file sj-pdf-3-ccx-10.1177_10732748241302915.pdf]

Medellín, March 1<sup>st</sup>, 2023

CEI-0190-03-2023

Dr.

JUANITA LOZANO ZAPATA

Principal investigator

Clinical Study

**Subject: Approval of Documentation for Initial Submission**

**Study Title:** "Factors associated with the quality of life in colorectal cancer patients at Fundación Clínica Vida in 2022."

Dear Dr. Lozano,

As President of the Ethics Committee for Research at Clínica Vida of the Fundación Colombiana de Cancerología Clínica Vida, I have reviewed the following documents submitted with letter CIP-0132-08-2022, dated February 26, 2023:

- Appendix 1 and 2: Instrument
- Appendix 3: Informed Consent
- Appendix 4: Interview Script

After reviewing the listed documents, I confirm that they comply with the changes and/or requirements requested in letter CEI-0088-01-2023, and they meet the regulatory standards. According to the committee's manual and its statutes, the president can grant this approval when all regulatory requirements are fulfilled.

This approval will be announced on March 8, 2023, at the next meeting of the Ethics Committee for Research at Clínica Vida, and it will be recorded in minute #122.

Kind regards,

**Carlos Alberto Velásquez Córdoba**

Presidente Comité de Ética en Investigación Clínica Vida

Avenida 33 No. 63A-18

Celular: 301-5243323

e-mail: [comite.etica@clinicavida.com](mailto:comite.etica@clinicavida.com)

Preparada por: Yuliet Puerta Alzate, secretaria

Revisada por: Carlos Velásquez Córdoba, presidente.
